# Supplementary material
Source: PubMed Central journal article supplement (PMC3690840)
Supplement: 1308295110_pnas.201308295SI.pdf [file 1308295110_pnas.201308295SI.pdf]

# Supporting Information

Suzuki et al. 10.1073/pnas.1308295110

## SI Materials and Methods

**Animals.** Eight-week-old male C57BL/6 mice were obtained from the The Jackson Laboratory. After acclimation under a 12:12 light–dark cycle for at least 1 wk, mice were individually housed and were handled once a day for 7–10 d. All procedures were approved by the Institutional Animal Care and Use Committee of the University of Texas Southwestern Medical Center at Dallas (UTSW) and were carried out in strict accordance with the National Institutes of Health Guide for the Care and Use of Laboratory Animals.

**Sleep Deprivation and Recovery Sleep.** Singly housed mice were randomly divided into three groups; gentle handling (GH) and cage change (CC) were performed during Zeitgeber time (ZT) 0–6. The control group was allowed ad libitum sleep for 6 h. The GH group was deprived of sleep by gently touching the cages when they started to recline (i.e., huddle) and lower their heads. To eliminate any possibility of additional stress or locomotion, we minimized touching the mice directly. The CC group was deprived of sleep by changing the cages once an hour. As necessary, a minimal GH sleep deprivation (SD) maneuver was additionally performed on each CC mouse. However, the GH was limited to a maximum of 6 min during the 6 h. Subsequently, in a study of the recovery sleep, mice were left to sleep freely during ZT6–8.

**Multiple Sleep Latency Test and Delta Power Measurements.** The mouse version of the multiple sleep latency test (MSLT) was performed during the sleep recovery period for 3 h from ZT6–9 in the light period. Thus, during this recovery period, all mice received 5 min of sleep disturbance by repetitive 8 s on, 2 s off cycling of an orbital shaker at 100 rpm once every 30 min followed by ad libitum sleep for 25 min (1). The method for forcing wakefulness during MSLT trials was distinct from GH and CC, ensuring that the results were not affected by acclimation of mice to GH or CC maneuvers. Sleep latency times were determined from the onset of sleep, as evaluated by the initial appearance of non-rapid eye movement (NREM) sleep throughout a 20-s epoch during each 30-min trial and used as an index for the degree of arousal. This 30-min trial was repeated six times. During MSLT trials, we measured delta power in the electroencephalography (EEG) during NREM movement sleep. Baseline EEG/electromyography (EMG) recording was monitored before MSLT for 3 d. The data from the third day during ZT6–9 were used as the baseline to normalize EEG power for each mouse. Vigilance state scoring of the EEG/EMG data and fast Fourier transformation (FFT) of the EEG signal to derive the spectral power distribution were conducted as previously described (1). EEG FFT data during NREM sleep in the baseline period were averaged across all epochs in each mouse. The total average EEG power (1–32 Hz) of the baseline period for each mouse was used as a baseline to normalize EEG power. EEG power in NREM sleep during each trial was averaged across epochs and then normalized for each mouse. Delta power was quantified as the sum of the power in the range from 1 to 4 Hz.

**Sample Collection.** Mice were cervically dislocated at ZT0, -6, or -8, and the diencephalon or whole brain was harvested in ice cold artificial cerebrospinal fluid with added sucrose (254 mM sucrose, 10 mM glucose, 1.25 mM NaH<sub>2</sub>PO<sub>4</sub>, 24 mM NaHCO<sub>3</sub>, 2 mM CaCl<sub>2</sub>, 2 mM MgSO<sub>4</sub>, and 3 mM KCl). At ZT6, blood from each mouse was collected into a tube, incubated on ice for 1 h,

and centrifuged at  $2,300 \times g$  for 15 min to obtain serum fraction. All of the samples were stored at  $-80^{\circ}\text{C}$ .

**RNA Isolation and RT-PCR.** Total RNA was isolated from the whole brain or diencephalon by TRIzol (Invitrogen), purified with the RNeasy Mini Kit (Qiagen), and reverse-transcribed into cDNA using the SuperScript II system (Invitrogen).

**Quantitative Real-Time PCR.** For quantitative real-time PCR (qPCR), the mixture contained cDNA, SYBER Green Mix (Applied Biosystems), and the optimal concentration of the corresponding primer pair (Table S1). qPCR reactions were performed with the ABI Prism 7000 Sequence Detection System (Applied Biosystems).

**Immunoprecipitation.** Anti-dynamin (DNM1) monoclonal (Abcam) and anti-N-myc downstream regulated gene 2 (NDRG2) antibodies (Santa Cruz) were used for immunoprecipitation. Diencephalon samples were lysed into radio-immunoprecipitation assay buffer containing Complete Mini (Roche) and phosphatase inhibitor mixtures (Sigma-Aldrich). Target proteins were immunoprecipitated from 30- or 100-ug total protein using antibodies with Protein A/G PLUS-Agarose (Santa Cruz).

**Western Blot.** Anti-DNM1 polyclonal (Abcam), anti-NDRG2 (2), anti-phosphoPKC substrate (Cell Signaling), anti-phosphoAkt substrate (Cell Signaling), anti-phosphotyrosine (4G10),  $\beta$ -actin (Santa Cruz),  $\beta$ -tubulin (Cell Signaling), and histone H3 (Cell Signaling) antibodies were used for Western blots. For 1D Western blots, samples were separated with 10% or 12% SDS/PAGE gels. For 2D Western blots, each sample was purified with the 2D-clean up kit (GE Healthcare), reconstituted with 2D lysis buffer, and separated with immobilin pI 4–7 strip and 10% SDS/PAGE gel. Then, proteins were transferred onto PVDF membranes and incubated with each primary antibody and then corresponding secondary antibodies. Blots were detected with ECL Plus (GE Healthcare); we then quantified the autoradiograph using ImageJ (National Institutes of Health). After antibodies were removed with a stripping buffer [100 mM 2-mercaptoethanol, 2% SDS, and 62.5 mM Tris-HCl (pH 6.7)], membranes were repeatedly used for Western blots.

**Two-Dimensional Difference Gel Electrophoresis.** Reagents were purchased from GE Healthcare. The lysed samples were purified using a 2-D Clean-UP Kit and reconstituted with 2D lysis buffer [7 M urea, 2 M thiourea, 30 mM Tris-HCl (pH 8.5), and 4% CHAPS]. After protein assay (Bio-Rad), reconstituted samples were diluted into 1  $\mu\text{g}/\mu\text{L}$  each with the 2D lysis buffer. Fifty micrograms of samples and the internal standard were prepared and labeled with Cy3, Cy5, and Cy2 (Table S2), according to the manufacturer's instructions and separated with pI 3–10 NL strips and 10–20% acrylamide SDS/PAGE gels. Gel images were scanned with the Typhoon Trio and analyzed with DeCyder 2D Software. Target proteins were selected as those with more than  $\pm 20\%$  difference compared with the control sample. In the Biological Variation Analysis (BVA) Module of DeCyder software, protein amount is expressed as standardized abundance calculated using the volume ratio. The standardized abundance was expressed relative to values of the control group at ZT6. Each volume ratio normalized to the internal standard was extracted from Gel data in the BVA Module through XML Toolbox. This volume ratio indicates the corresponding fold changes to the codetected pooled standard spot. Then, each standardized abundance was calculated using the volume ratio (the obtained standardized abundance is relatively

expressed to the codetected spot of the corresponding internal standard), and normalized to the control group.

**Protein Identification.** For protein identification, 500  $\mu\text{g}$  of the phosphor-protein enriched protein sample was separated by two-dimensional gel electrophoresis and stained with Deep Purple (GE Healthcare). The target spots were picked and identified by nano-liquid chromatography–tandem mass spectrometry operated by the UTSW Protein Chemistry Technology Center. The results were searched against the National Center for Biotechnology Information protein sequence databases using the Mascot search engine (Matrix Science).

**Phosphatase Treatment.** For protein dephosphorylation treatment, the concentration of reconstituted sample was adjusted at 0.5  $\mu\text{g}/\mu\text{L}$ . Then, 100  $\mu\text{L}$  of the sample was divided into 50  $\mu\text{L}$  each. The

50  $\mu\text{L}$  of sample was mixed with 5  $\mu\text{L}$  of 10% SDS, 10 $\times$  buffer (New England BioLabs), 5  $\mu\text{L}$  of 10 mM  $\text{CaCl}_2$ , and 345  $\mu\text{L}$  of  $\text{H}_2\text{O}$  with or without 200 units of  $\lambda$ -phosphatase (PPase; New England BioLabs), and incubated at 30  $^\circ\text{C}$  for 8 h (3). After being purified with the 2D clean-up kit again, samples were separated by 2DE.

**Statistical Analysis.** Differences between multiple groups were evaluated by one-way ANOVA after establishing equivalence of variances and normal distribution. Post hoc testing was performed by the Tukey's test. Values of immunoprecipitated samples were normalized with IgG. Values shown are means  $\pm$  SEM, within  $n = 3$ –12. Significance was accepted at the 0.05 level. Differences between multiple groups were evaluated by one-way ANOVA after establishing equivalence of variances and normal distribution of data. Post hoc testing was performed by Tukey's test.

1. Sinton CM, Kovakkattu D, Friese RS (2009) Validation of a novel method to interrupt sleep in the mouse. *J Neurosci Methods* 184(1):71–78.
2. Okuda T, Kokame K, Miyata T (2008) Differential expression patterns of NDRG family proteins in the central nervous system. *J Histochem Cytochem* 56(2):175–182.

3. Yamagata A, et al. (2002) Mapping of phosphorylated proteins on two-dimensional polyacrylamide gels using protein phosphatase. *Proteomics* 2(9):1267–1276.

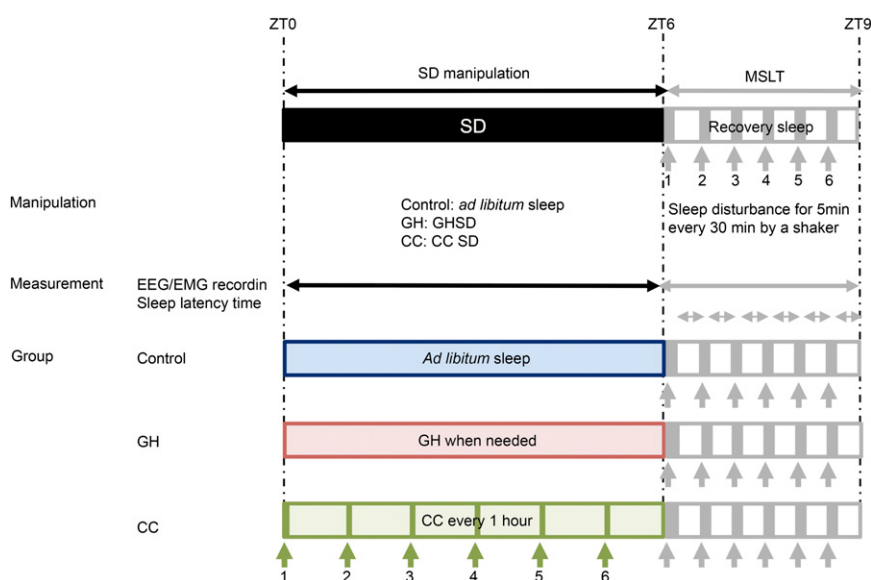

**Fig. S1.** Experimental timeline of SD followed by MSLT. After different SD manipulations for 6 h, mice were disturbed for 5 min every 30 min by an orbital shaker during sleep recovery period. EEG/EMG signals were monitored throughout ZT0–9. Sleep latency time was measured during the 25-min *ad libitum* sleep period after each 5-min sleep disturbance.

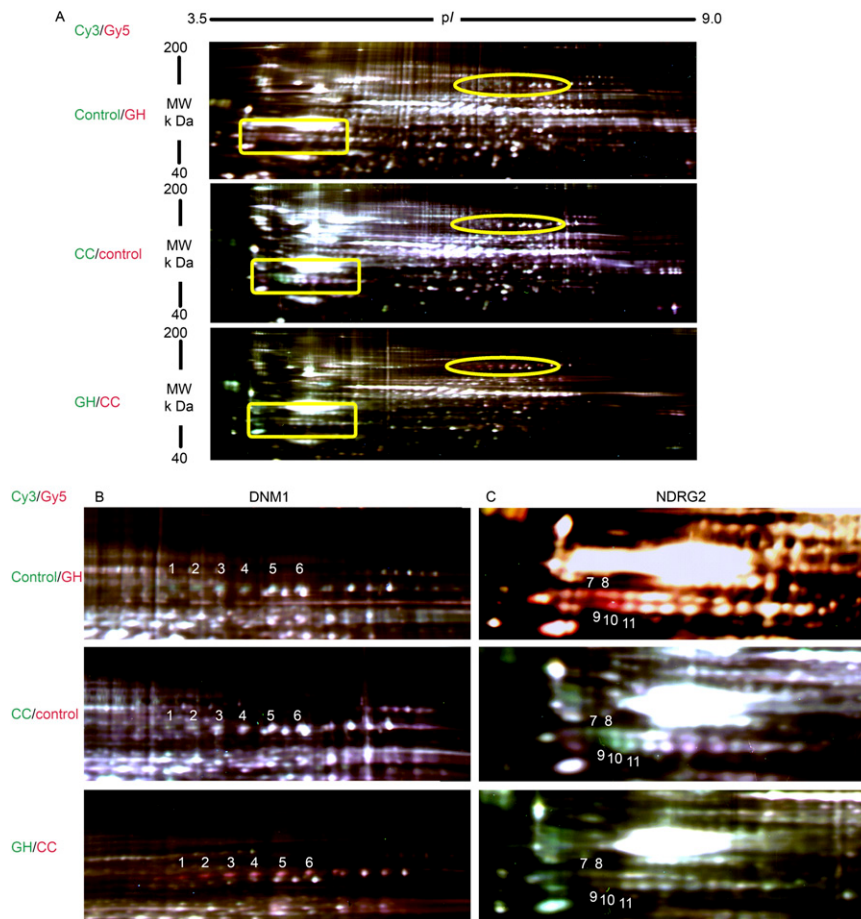

**Fig. S2.** Screenings for the degree of arousal and homeostatic sleep need biochemical markers assessed by 2D difference gel electrophoresis (2D-DIGE). Phosphorylated proteins were enriched from the diencephalon at ZT6. *Top*, *Middle*, and *Bottom* show 2D-DIGE images as comparisons of the control (green) and GH (red) groups, the CC (green) and control (red) groups, and the GH (green) and CC (red) groups, respectively. The green or red spots (nos. 1–11) represent proteins up-regulated between the paired samples. (A) Representative images of 2D-DIGE. Areas enclosed by ellipses and rectangles in A are enlarged in B and C, respectively. (B) The candidate spots associated with the sleep latency time and lowered in the GH group compared with the control (green, *Top*) and CC (red, *Bottom*) groups. The levels of the spots were similar in the control and CC groups (white, *Middle*). (C) The candidate spots associated with delta power and increased in the GH (red, *Top*) and CC (green, *Middle*) groups compared with the control group. No significant difference of the spots was observed between GH and CC groups (white, *Middle*).

**A** Phosphatase  
- +  
kDa  
200  
116  
97  
66  
45  
31  
20

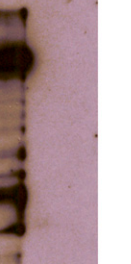

**B** DNM1  
Merge  
Control treatment  
Phosphatase treatment

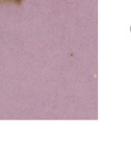

**C** NDRG2  
Merge  
Control treatment  
Phosphatase treatment

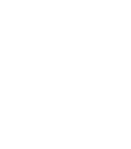

4 of 6

**Fig. S6.** Target phospho-NDRG2 spots are detected with antibodies against phosphorylated Akt (P-Akt) substrates and phosphorylated PKC (P-PKC) substrate. NDRG2 was immunoprecipitated from whole protein sample, separated by 2DE, and blotted by anti-NDRG2 (*Top*), P-Akt substrate, and P-PKC substrate antibodies. P-Akt substrate and P-PKC substrate antibodies detect seven and five spots out of eight NDRG2 spots immunoprecipitated, respectively.

| Gene                 | Forward/reverse | Sequence                     | Accession no. |
|----------------------|-----------------|------------------------------|---------------|
| <i>Homer 1a</i>      | Forward         | ATGAACTTCCATATTATCCACCTTACTT | NM_011982.2   |
|                      | Reverse         | GCATTGCCATTTCACATAGG         |               |
| <i>GLUT1</i>         | Forward         | CCTATGGCCAAGGACACACT         | NM_011400.2   |
|                      | Reverse         | CTGGTGTCTCAGCAAGGAAAG        |               |
| <i>Nur77</i>         | Forward         | TGATGTTCCCGCCTTTGC           | NM_010444.1   |
|                      | Reverse         | GAGCCCGTGTCTGATCAGTG         |               |
| <i>Arc</i>           | Forward         | AGCAGCAGACCTGACATCCT         | NM_018790.2   |
|                      | Reverse         | GTGATGCCCTTTCCAGACAT         |               |
| <i>BDNF</i>          | Forward         | CCATAAAGGACGCGGACTTGACA      | NM_007540.4   |
|                      | Reverse         | AGACATGTTTGCGGCATCCAG        |               |
| <i>c-fos</i>         | Forward         | CTGTCAACACACAGGACTTTT        | NM_010234.2   |
|                      | Reverse         | AGGAGATAGCTGCTCTACTTTG       |               |
| <i>Bip (GRP78)</i>   | Forward         | GCTTCGTGTCTCCTCTCTGAC        | NM_022310.3   |
|                      | Reverse         | GGAATAGGTGGTCCCAAGT          |               |
| <i>HSP27</i>         | Forward         | GACAGCTCAGCAGCGGGGTCTC       | NM_013560.2   |
|                      | Reverse         | TAAGTGTGCCCTCAGGGGATAGGG     |               |
| <i>DNM1</i>          | Forward         | GCAGAAGGTCTCTCAATCAGC        | NM_010065     |
|                      | Reverse         | TCGAAGTCCACTGCAAACCTG        |               |
| <i>NDRG2</i>         | Forward         | GCACACCATGGAAGTCTCCT         | NM_013864.2   |
|                      | Reverse         | ACAATAGTCCCGTGACCCCGGGAAA    |               |
| <i>Cyclophilin B</i> | Forward         | GGAGATGGCACAGGAGGAA          | NM_011149     |
|                      | Reverse         | GCCCGTAGTGCTTCAGCTT          |               |

*Arc*, activity-regulated cytoskeletal-associated protein; *BDNF*, brain-derived neurotrophic factor; *Bip* (*GRP78*), binding immunoglobulin protein/glucose-regulated protein 78 (*Bip/GRP78*); *GLUT1*, glucose transporter 1; *HSP27*, heat shock protein.

**Table S2. Combination of CyDye labeling in 2D-DIGE**

| Figure no.             | Cy3                       | Cy5                    | Cy2               |
|------------------------|---------------------------|------------------------|-------------------|
| Fig. S2, <i>Top</i>    | Control                   | GH                     | Internal standard |
| Fig. S2, <i>Middle</i> | CC                        | Control                | Internal standard |
| Fig. S2, <i>Bottom</i> | GH                        | CC                     | Internal standard |
| Fig. S4B               | Phosphatase treatment     | Control treatment      | —                 |
| Fig. S4C               | Control treatment         | Phosphatase treatment  | —                 |
| Fig. S5A               | Immunoprecipitated sample | Phosphorylated protein | —                 |
